# Supplementary material for: Reactant Discovery with an Ab Initio Nanoreactor: Exploration of Astrophysical N-Heterocycle Precursors and Formation Pathways
Source: PubMed Central journal article supplement (PMC11418024; doi:10.1021/acsearthspacechem.4c00120), 2024-08-09
Supplement: sp4c00120_si_001.pdf [file sp4c00120_si_001.pdf]

# Reactant discovery with an ab initio nanoreactor: Exploration of astrophysical N-heterocycle precursors and formation pathways

Sommer L. Johansen,<sup>†,‡,¶</sup> Heejune Park,<sup>†,¶</sup> Lee-Ping Wang,<sup>\*,†</sup> and Kyle  
N. Crabtree<sup>\*,†</sup>

<sup>†</sup>*Department of Chemistry, University of California, Davis, Davis, CA 95616*

<sup>‡</sup>*Present Address: Sandia National Laboratories, Livermore, CA*

<sup>¶</sup>*Equal contribution*

E-mail: leeping@ucdavis.edu; kncrabtree@ucdavis.edu

## List of Tables

|    |                                                        |    |
|----|--------------------------------------------------------|----|
| S1 | Starting spheres for nanoreactor simulations . . . . . | S3 |
| S2 | Nanoreactor sphere parameters . . . . .                | S3 |
| S3 | Bimolecular pyridine trajectories . . . . .            | S4 |
| S4 | Bimolecular pyrrolyl trajectories . . . . .            | S4 |
| S5 | File descriptions . . . . .                            | S5 |

This document is accompanied by computational input/output files in a zip archive for all of the stationary points described in the main manuscript. The contents are organized into 4 folders:

**nanoreactor\_products** xyz files with  $\omega$ B97X-D/cc-pVTZ optimized geometries of nanoreactor products. Each file is labeled by its numeric identifier in Figures 3 and 4.

**reaction1** Optimized geometries ( $\omega$ B97X-D/cc-pVTZ), harmonic frequencies ( $\omega$ B97X-D/cc-pVTZ), and CCSD(T)/cc-pVTZ// $\omega$ B97X-D/cc-pVTZ energies of stationary points for the azete + cyanomethyl radical reaction (Figure 5). Files for each stationary point are included in a folder labeled by the structure identifier in Figure 5. Transition state structure folders also contain outputs of internal reaction coordinate (IRC) calculations connecting the structure to adjacent structures on the potential energy surface.

**reaction2** Optimized geometries ( $\omega$ B97X-D/cc-pVTZ), harmonic frequencies ( $\omega$ B97X-D/cc-pVTZ), and CCSD(T)/cc-pVTZ// $\omega$ B97X-D/cc-pVTZ energies of stationary points for the ethenimine +  $\beta$ =cyanovinyl radical reaction (Figure 6). Files for each stationary point are included in a folder labeled by the structure identifier in Figure 6. Transition state structure folders also contain outputs of internal reaction coordinate (IRC) calculations connecting the structure to adjacent structures on the potential energy surface.

**reaction3** Optimized geometries ( $\omega$ B97X-D/cc-pVTZ), harmonic frequencies ( $\omega$ B97X-D/cc-pVTZ), and CCSD(T)/cc-pVTZ// $\omega$ B97X-D/cc-pVTZ energies of stationary points for the 1-pyrrolyl + cyanomethylene diradical reaction (Figure 7). Files for each stationary point are included in a folder labeled by the structure identifier in Figure 7. Transition state structure folders also contain outputs of internal reaction coordinate (IRC) calculations connecting the structure to adjacent structures on the potential energy surface.

Table S1: Starting spheres for nanoreactor simulations. For each sphere, numbers of each species, the number of different starting configurations, and the total number of simulations are listed.

| Label  | Type     | N-heterocycle | CN | He | Configurations | Total Simulations |
|--------|----------|---------------|----|----|----------------|-------------------|
| Prdn1  | pyridine | 1             | 1  | 50 | 4              | 76                |
| Prdn2a | pyridine | 2             | 1  | 10 | 2              | 72                |
| Prdn2b | pyridine | 2             | 1  | 20 | 4              | 52                |
| Prdn3  | pyridine | 3             | 3  | 20 | 4              | 25                |
| Prdn5  | pyridine | 5             | 5  | 20 | 4              | 24                |
| Pyrl1  | pyrrole  | 1             | 1  | 50 | 6              | 60                |
| Pyrl2  | pyrrole  | 2             | 2  | 30 | 4              | 96                |

Table S2: Ranges of parameters explored for each sphere (by label in Table S1).

| Sphere | $T$<br>(K)  | $r_1$<br>(Å) | $r_2$<br>(Å) | $t_1$<br>(0.5 fs) | $t_2$<br>(0.5 fs) | $k_1$<br>( $\frac{\text{kcal}}{\text{mol}^{-1}\text{Å}^{-2}}$ ) | $k_2$<br>( $\frac{\text{kcal}}{\text{mol}^{-1}\text{Å}^{-2}}$ ) |
|--------|-------------|--------------|--------------|-------------------|-------------------|-----------------------------------------------------------------|-----------------------------------------------------------------|
| Prdn1  | 1500 - 2500 | 8.0 - 12.0   | 3.0 - 5.0    | 2000              | 200 - 1000        | 1.0                                                             | 0.5 - 0.75                                                      |
| Prdn2a | 2000        | 8.0 - 12.0   | 3.0 - 5.0    | 1000 - 2000       | 200 - 800         | 1.0                                                             | 0.5                                                             |
| Prdn2b | 1000 - 3500 | 12.0         | 3.0 - 5.0    | 2000              | 1000              | 1.0                                                             | 0.5                                                             |
| Prdn3  | 1000 - 3000 | 12.0         | 4.5 - 5.0    | 2000              | 1000              | 1.0                                                             | 0.5                                                             |
| Prdn5  | 1000 - 3000 | 12.0         | 5.0          | 2000              | 1000              | 1.0                                                             | 0.5                                                             |
| Pyrl1  | 1500 - 3500 | 12.0         | 3.0          | 1500              | 200 - 1000        | 1.0                                                             | 0.5 - 1.0                                                       |
| Pyrl2  | 1500 - 2500 | 8.0 - 12.0   | 3.0 - 4.0    | 1500              | 300 - 600         | 1.0                                                             | 0.5                                                             |

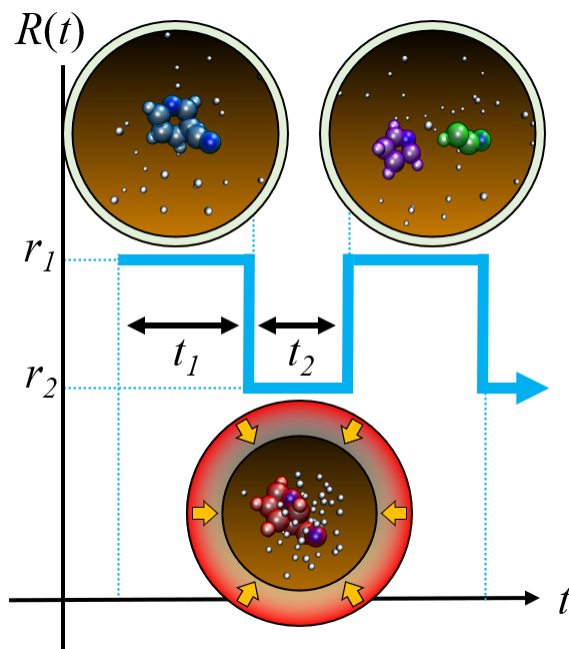

Figure S1: The visual example of the overall nanoreactor cycle.

Table S3: Parameters of Prdn1 trajectories resulting in in two products.

| config | $T$<br>(K) | $r_1$<br>(Å) | $r_2$<br>(Å) | $k_1$<br>( $\frac{\text{kcal}}{\text{molÅ}^2}$ ) | $k_2$<br>( $\frac{\text{kcal}}{\text{molÅ}^2}$ ) | $t_1$<br>(0.5 fs) | $t_2$<br>(0.5 fs) | Products                                  |
|--------|------------|--------------|--------------|--------------------------------------------------|--------------------------------------------------|-------------------|-------------------|-------------------------------------------|
| 0      | 1500       | 10.0         | 3.0          | 1.0                                              | 0.5                                              | 2000              | 500               | HCCHCHCHNC + HCN                          |
| 0      | 2500       | 8.0          | 5.0          | 1.0                                              | 0.5                                              | 2000              | 500               | HCN + para-pyridyl                        |
| 0      | 2500       | 8.0          | 3.0          | 1.0                                              | 0.5                                              | 2000              | 500               | HCN + para-pyridyl                        |
| 0      | 2500       | 10.0         | 5.0          | 1.0                                              | 0.5                                              | 2000              | 500               | H + NCCHCHCHCHCN                          |
| 1      | 1500       | 12.0         | 3.0          | 1.0                                              | 0.5                                              | 2000              | 1000              | HNC + HCCCHCHCHN                          |
| 1      | 1500       | 12.0         | 3.0          | 1.0                                              | 0.6                                              | 2000              | 1000              | HCN + CNCHCHCCH <sub>2</sub>              |
| 1      | 2000       | 12.0         | 3.0          | 1.0                                              | 0.75                                             | 2000              | 200               | H <sub>2</sub> CCNCHCCH + HCN             |
| 1      | 2500       | 8.0          | 3.0          | 1.0                                              | 0.5                                              | 2000              | 500               | HCN + m-pyridyl                           |
| 1      | 2500       | 10.0         | 3.0          | 1.0                                              | 0.5                                              | 2000              | 500               | N <sub>2</sub> + HCCCHCHCHCH              |
| 1      | 2500       | 10.0         | 5.0          | 1.0                                              | 0.5                                              | 2000              | 500               | HCCH + HCNCHCHCN                          |
| 2      | 1500       | 10.0         | 3.0          | 1.0                                              | 0.5                                              | 2000              | 500               | HCN + o-pyridyl                           |
| 2      | 1500       | 12.0         | 3.0          | 1.0                                              | 0.5                                              | 2000              | 1000              | HNC + HCCHCHCHCN                          |
| 2      | 1500       | 12.0         | 3.0          | 1.0                                              | 0.6                                              | 2000              | 500               | HCN + HCCCHNCCH <sub>2</sub>              |
| 3      | 1500       | 12.0         | 3.0          | 1.0                                              | 0.75                                             | 2000              | 500               | HCCCHCHCNH + HCN                          |
| 3      | 1500       | 12.0         | 3.0          | 1.0                                              | 0.75                                             | 2000              | 200               | pyrrolyl + HCCN                           |
| 3      | 1500       | 12.0         | 3.0          | 1.0                                              | 0.75                                             | 2000              | 500               | pyrrolyl + HCCN                           |
| 3      | 2000       | 12.0         | 3.0          | 1.0                                              | 0.75                                             | 2000              | 200               | HCN + HCCHCCHCHN                          |
| 3      | 2500       | 12.0         | 3.0          | 1.0                                              | 0.5                                              | 2000              | 500               | C <sub>3</sub> N + CH <sub>2</sub> CHCHNH |
| 3      | 2500       | 10.0         | 3.0          | 1.0                                              | 0.5                                              | 2000              | 500               | H + o-isocyanopyridine                    |

Table S4: Parameters of Pyr1l trajectories resulting in two products.

| config | $T$<br>(K) | $r_1$<br>(Å) | $r_2$<br>(Å) | $k_1$<br>( $\frac{\text{kcal}}{\text{molÅ}^2}$ ) | $k_2$<br>( $\frac{\text{kcal}}{\text{molÅ}^2}$ ) | $t_1$<br>(0.5 fs) | $t_2$<br>(0.5 fs) | Products                              |
|--------|------------|--------------|--------------|--------------------------------------------------|--------------------------------------------------|-------------------|-------------------|---------------------------------------|
| 0      | 2500       | 12.0         | 3.0          | 1.0                                              | 0.5                                              | 1500              | 1000              | HCN + HCHCH <sub>2</sub> CCN          |
| 0      | 2500       | 12.0         | 3.0          | 1.0                                              | 0.5                                              | 1500              | 500               | HNC + 1-pyrrolyl                      |
| 0      | 1500       | 12.0         | 3.0          | 1.0                                              | 0.5                                              | 1500              | 1000              | HCN + c-CHCHC(CHNH)                   |
| 0      | 1500       | 12.0         | 3.0          | 1.0                                              | 0.5                                              | 1500              | 500               | HCN + CCHNHCHCH                       |
| 1      | 1500       | 12.0         | 3.0          | 1.0                                              | 0.5                                              | 1500              | 1000              | HCCH + NCCHCHNH                       |
| 2      | 1500       | 12.0         | 3.0          | 1.0                                              | 0.5                                              | 1500              | 1000              | HCN + 2-pyrrolyl                      |
| 3      | 1500       | 12.0         | 3.0          | 1.0                                              | 0.5                                              | 1500              | 500               | HCCH + H <sub>2</sub> CNCHCN          |
| 3      | 1500       | 12.0         | 3.0          | 1.0                                              | 0.75                                             | 1500              | 200               | HCCHCN + H <sub>2</sub> CCNH          |
| 3      | 1500       | 12.0         | 3.0          | 1.0                                              | 0.75                                             | 1500              | 500               | HCCH + NCCHCHNH                       |
| 3      | 2500       | 12.0         | 3.0          | 1.0                                              | 0.5                                              | 1500              | 1000              | H + 3-cyanopyrrole                    |
| 3      | 3500       | 12.0         | 3.0          | 1.0                                              | 0.5                                              | 1500              | 1000              | H + c-CHC(H)(HCNC)C(CN)               |
| 4      | 3500       | 12.0         | 3.0          | 1.0                                              | 0.5                                              | 1500              | 1000              | H + 2-cyanopyrrole                    |
| 5      | 1500       | 12.0         | 3.0          | 1.0                                              | 0.5                                              | 1500              | 500               | HCCN + 1-hydroazete                   |
| 5      | 1500       | 12.0         | 3.0          | 1.0                                              | 0.75                                             | 1500              | 200               | HNC + C <sub>4</sub> H <sub>4</sub> N |
| 5      | 1500       | 12.0         | 3.0          | 1.0                                              | 0.75                                             | 1500              | 500               | 2-pyrrolyl + HNC                      |
| 5      | 2500       | 12.0         | 3.0          | 1.0                                              | 0.5                                              | 1500              | 1000              | HCN + 1-pyrrolyl                      |
| 5      | 2500       | 12.0         | 3.0          | 1.0                                              | 0.5                                              | 1500              | 500               | HCN + 1-pyrrolyl                      |

Table S5: Descriptions of files for each structure contained in folders “reaction1”, “reaction2”, and “reaction3”

| Filename      | Description                                                                               |
|---------------|-------------------------------------------------------------------------------------------|
| ccsd_sp.out   | CCSD(T)/cc-pVTZ// $\omega$ B97X-D/cc-pVTZ single-point output file                        |
| freq.out      | $\omega$ B97X-D/cc-pVTZ harmonic frequency calculation output file                        |
| optimize.out  | $\omega$ B97X-D/cc-pVTZ geometry optimization output file                                 |
| optimized.xyz | $\omega$ B97X-D/cc-pVTZ optimized geometry, xyz format                                    |
| irc.out       | $\omega$ B97X-D/cc-pVTZ internal reaction coordinate output file (TS only)                |
| irc.xyz       | $\omega$ B97X-D/cc-pVTZ optimized geometries along internal reaction coordinate (TS only) |
